# Supplementary material
Source: Springer Nature journal article supplement (https://www.springermedizin.de/resource/supplementary/12889_2013_6796_MOESM5_ESM.pdf/9498878)
Supplement: MOESM5 [file 9498878]

I EXPECT THAT A DIETITIAN...

...will mainly talk about the types of foods that are not allowed (n=418)



0

...will help a patient to stick to a diet (n=416)

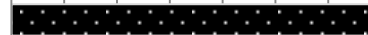

0

...will help a patient to become motivated (n=418)

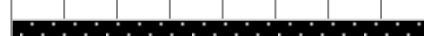

0

...will help a patient to remain motivated (n=418)

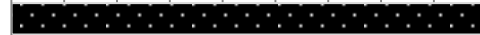

0

...will deliver good quality of care (n=409)

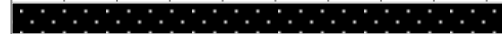

0

...will support a patient to achieve his or her goals (n=418)

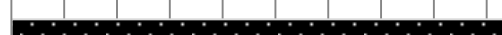

0

...will give a personal dietary advice (n=410)

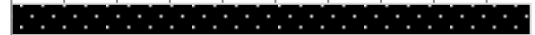

0

...will formulate goals which are discussed with a patient (n=417)

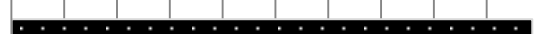

0

... is a food and nutrition specialist (n=410)

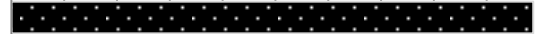

0

0 10 20 30 40 50 60 70 80 90 100
